# Supplementary material for: Diversity of culturable bacterial endophytes of saffron in Kashmir, India
Source: PubMed Central journal article supplement (PMC4630316; doi:10.1186/s40064-015-1435-3), 2015-11-02
Supplement: 40064_2015_1435_MOESM1_ESM.pdf [file 40064_2015_1435_MOESM1_ESM.pdf]

Table-S1 Morphological features of bacterial endophytes isolated from leaf and corm of saffron

| Endophytic bacterial isolates | Colony Characteristics   |             |                 |           |          |
|-------------------------------|--------------------------|-------------|-----------------|-----------|----------|
|                               | Texture                  | Margin      | Colour          | Elevation | Growth   |
| TS-2                          | Smooth and sticky        | Wavy        | Yellowish white | Raised    | Fast     |
| TS-3                          | Smooth and sticky        | Entire      | Transparent     | Flat      | Slow     |
| TS-4                          | Rough and dry            | Entire      | Dirty white     | Raised    | Moderate |
| TS-5                          | Smooth and sticky shiny  | Filamentous | Yellowish white | Flat      | Fast     |
| TS-6                          | Smooth and sticky        | Wavy        | Dirty white     | Flat      | Fast     |
| TS-7                          | Rough and dry            | Filamentous | Dirty white     | Flat      | Fast     |
| TS-8                          | Smooth and sticky        | Entire      | Light yellow    | Raised    | Moderate |
| TS-9                          | Smooth and sticky        | Wavy        | Light yellow    | Raised    | Moderate |
| TS-10                         | Smooth and dry           | Wavy        | Light yellow    | Flat      | Fast     |
| TS-11                         | Rough and dry            | Entire      | Dirty white     | Raised    | Moderate |
| TS-12                         | Smooth and sticky        | Filamentous | Dirty white     | Flat      | Fast     |
| TS-13                         | Rough and dry            | Filamentous | yellowish white | Flat      | Moderate |
| TS-14                         | Smooth, sticky and shiny | Filamentous | Light yellow    | Flat      | Moderate |
| TS-15                         | Smooth and sticky        | Entire      | White           | Raised    | Slow     |
| TS-16                         | Rough and dry            | Filamentous | Dirty white     | Flat      | Fast     |
| TS-17                         | Rough and dry            | Filamentous | White           | Flat      | Fast     |
| TS-18                         | Smooth and sticky        | Entire      | Dirty white     | Raised    | Moderate |



|                      |   |   |   |   |   |   |   |   |   |   |   |   |   |   |   |   |   |   |   |   |   |
|----------------------|---|---|---|---|---|---|---|---|---|---|---|---|---|---|---|---|---|---|---|---|---|
| Malonate utilization | + | - | - | + | + | + | + | - | + | + | + | - | + | - | + | + | + | + | - | - | + |
| Esculin hydrolysis   | + | - | + | + | - | + | + | + | + | + | - | + | + | - | + | + | + | + | + | - | + |
| Arabinose            | - | - | + | - | - | - | - | - | - | - | - | - | - | - | - | + | - | - | - | - | - |
| Xylose               | - | - | - | - | - | - | - | - | - | - | - | - | - | + | - | - | - | - | + | - | + |
| Adonitol             | - | - | - | - | - | - | - | - | - | - | - | - | - | - | - | - | - | - | - | - | - |
| Rhamnose             | - | - | - | - | - | - | - | - | - | - | - | - | - | - | - | - | - | - | - | - | - |
| Cellobiose           | - | - | + | + | - | + | + | - | + | + | - | + | - | - | - | + | - | - | + | - | + |
| Melibiose            | - | - | - | - | - | - | - | - | - | - | - | - | - | + | - | - | - | - | + | - | + |
| Saccharose           | - | - | + | + | - | + | + | + | + | + | + | + | - | + | - | + | - | + | + | + | + |
| Raffinose            | - | - | - | - | - | - | - | - | - | - | - | - | - | - | - | - | - | - | - | - | + |
| Trehalose            | - | - | + | + | + | + | + | + | + | + | + | + | - | + | - | + | - | + | + | - | + |
| Glucose              | + | + | + | + | + | + | + | + | + | + | + | + | + | + | + | + | + | + | + | + | + |
| Lactose              | - | - | - | - | - | - | - | - | - | - | - | - | - | - | - | - | - | - | - | + | - |
| Oxidase              | + | + | + | + | + | + | + | + | + | + | + | + | + | + | + | + | + | + | + | - | + |

‘+’ indicates bacterial isolate showing positive test for the substrate whereas ‘-’ sign indicates negative test
